# Supplementary material for: Nitrogen-doped graphene/carbon nanotube/Co3O4 hybrids: one-step synthesis and superior electrocatalytic activity for the oxygen reduction reaction
Source: Royal Society of Chemistry journal article supplement (doi:10.1039/c5ra17759f), 2015-01-01
Supplement: c5ra17759f1.pdf [file c5ra17759f1.pdf]

**Nitrogen-doped graphene/carbon nanotube/Co<sub>3</sub>O<sub>4</sub> hybrids:  
One-step synthesis and superior electrocatalytic activity for  
oxygen reduction reaction**

**Hengyi Lu,<sup>a</sup> Yunpeng Huang,<sup>a</sup> Jiajie Yan,<sup>a</sup> Wei Fan<sup>\*b</sup> and Tianxi Liu<sup>\*ab</sup>**

**Electronic Supplementary Information (ESI)**

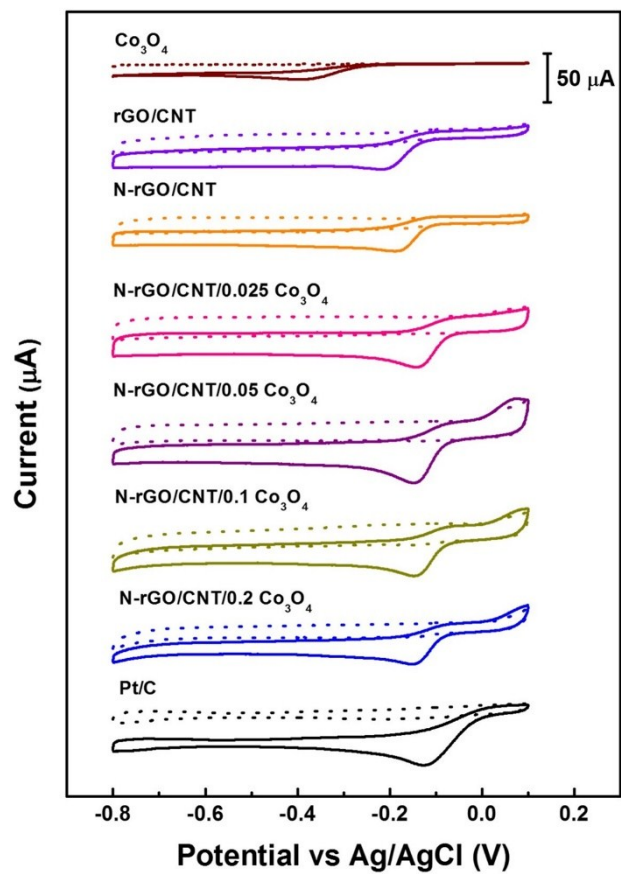

**Fig. S1** CVs of pure  $\text{Co}_3\text{O}_4$ , rGO/CNT, N-rGO/CNT, N-rGO/CNT/ $\text{Co}_3\text{O}_4$  hybrids (with different  $\text{Co}_3\text{O}_4$  contents) and commercial Pt/C in  $\text{N}_2$  (dot line) and  $\text{O}_2$  (solid line) saturated 0.1 M KOH.

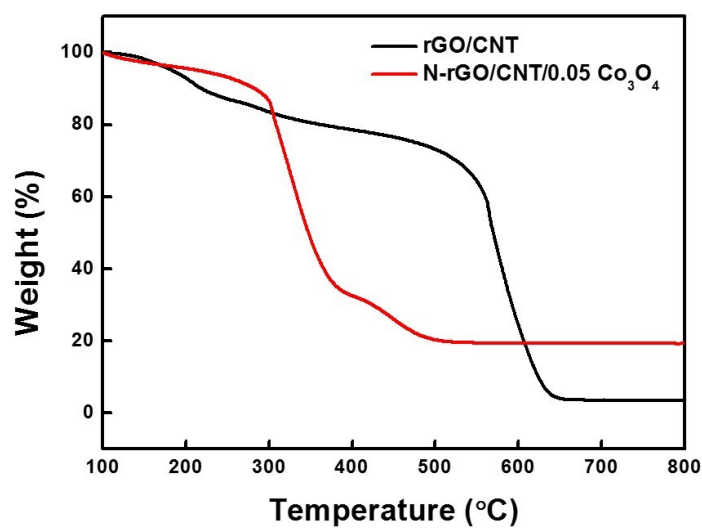

**Fig. S2** TGA curves of N-rGO/CNT and N-rGO/CNT/0.05 Co<sub>3</sub>O<sub>4</sub> hybrids in air.

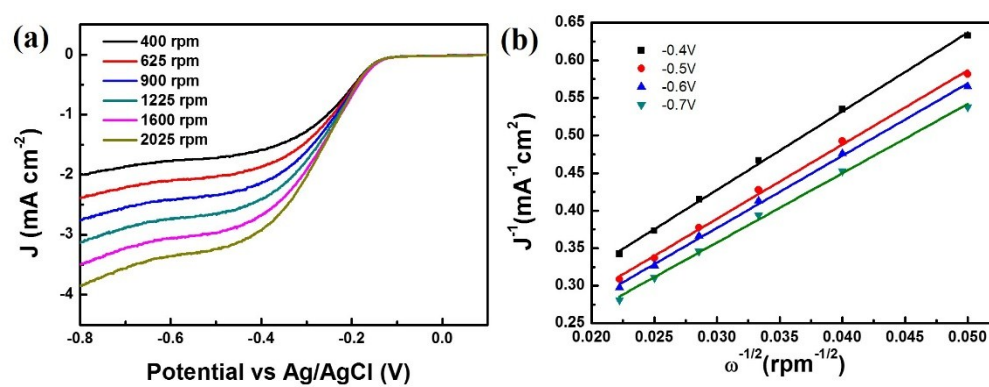

**Fig. S3** (a) RDE voltammograms of rGO/CNT hybrid in O<sub>2</sub> saturated 0.1 M KOH at rotation rates from 400 rpm to 2025 rpm. (b) K-L plots of the rGO/CNT hybrid.

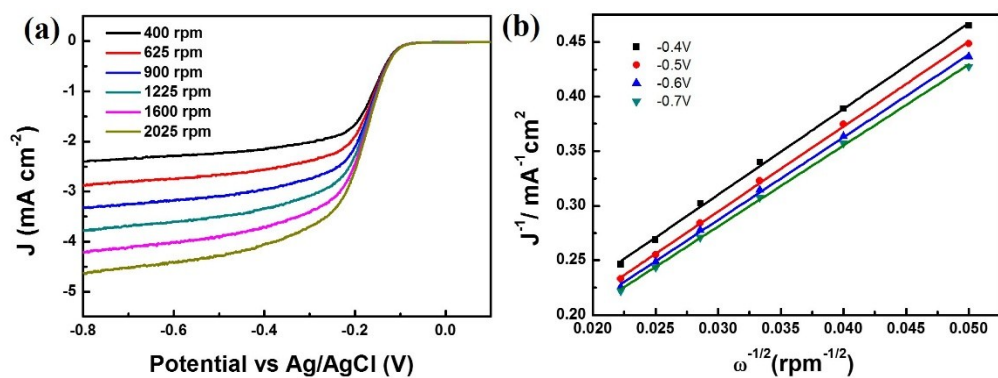

**Fig. S4** (a) RDE voltammograms of N-rGO/CNT hybrid in O<sub>2</sub> saturated 0.1 M KOH at rotation rates from 400 rpm to 2025 rpm. (b) K-L plots of the N-rGO/CNT hybrid.

**Table S1.** Comparison of ORR catalytic performance between N-rGO/CNT/Co<sub>3</sub>O<sub>4</sub> hybrid and previous reports.

| Catalyst                                                             | Synthesis methods                                                   | Reference electrode | Peak Potential (V) | Onset Potential (V) | Electron Transfer Number       | Ref.      |
|----------------------------------------------------------------------|---------------------------------------------------------------------|---------------------|--------------------|---------------------|--------------------------------|-----------|
| <b>N-rGO/CNT/Co<sub>3</sub>O<sub>4</sub></b>                         | One step hydrothermal reaction                                      | Ag/AgCl             | -0.15              | -0.09               | 3.98 at -0.4 to -0.7 V         | This Work |
| <b>Nitrogen-doped Graphene</b>                                       | CVD                                                                 | Ag/AgCl             | N.A.               | ~ -0.2              | 3.6 at -0.4 to -0.8 V          | 1         |
| <b>Nitrogen-doped graphene</b>                                       | High temperature treatment                                          | Ag/AgCl             | -0.32              | -0.18               | 3.6 at -1.0 V to 4.0 at -0.5 V | 2         |
| <b>Nitrogen-doped graphene</b>                                       | High temperature treatment                                          | Ag/AgCl             | N.A.               | ~-0.1               | 3.4 - 3.6 at -0.3 to -0.8 V    | 3         |
| <b>Sulfur-doped graphene</b>                                         | High temperature treatment                                          | Ag/AgCl             | -0.32              | N.A.                | 3.82 at -0.3 V                 | 4         |
| <b>Nitrogen, sulfur-doped mesoporous graphene</b>                    | High temperature treatment                                          | Ag/AgCl             | -0.24              | -0.06               | 3.3 - 3.6 at -0.4 to -0.8 V    | 5         |
| <b>Vertically aligned nitrogen-containing CNT</b>                    | pyrolysis of iron(II) phthalocyanine                                | Ag/AgCl             | -0.15              | -0.1                | 3.9 at -0.6 V                  | 6         |
| <b>Nitrogen-doped graphene/CNT</b>                                   | Pre-oxidation followed by hydrothermal reaction                     | Ag/AgCl             | ~-0.3              | -0.14               | 3.3 - 3.7 at -0.4 to -0.7 V    | 7         |
| <b>Graphene/CNT</b>                                                  | Hydrothermal reaction                                               | Ag/AgCl             | -0.22              | N.A.                | 3.86 at -0.35 V                | 8         |
| <b>Nitrogen-doped graphene/CNT/Co<sub>3</sub>O<sub>4</sub> paper</b> | Two step hydrothermal method grow Co <sub>3</sub> O <sub>4</sub> on | Ag/AgCl             | ~-0.2              | -0.06               | 3.97 at -0.7 V                 | 9         |

| rGO/CNT paper                                                         |                                                      |        |        |        |                                        |    |
|-----------------------------------------------------------------------|------------------------------------------------------|--------|--------|--------|----------------------------------------|----|
| <b>Nitrogen-doped graphene/<br/>Co<sub>3</sub>O<sub>4</sub></b>       | Two step method                                      | RHE    | N.A.   | ~-0.88 | 4.0 at 0.6 to 0.75 V                   | 10 |
| <b>CoO/nitrogen-doped CNT</b>                                         | Two step method                                      | RHE    | 0.86   | 0.93   | 3.9 at 0.4 to 0.9 V                    | 11 |
| <b>Co<sub>3</sub>O<sub>4</sub>/nitrogen-doped mesoporous graphene</b> | Two step method                                      | RHE    | 0.82   | 0.93   | ~ 4 at 0.2 to 0.7 V                    | 12 |
| <b>Nitrogen-doped SWCNT/graphene</b>                                  | CVD                                                  | RHE    | N.A.   | 0.88   | 3.3 at 0.47 V                          | 13 |
| <b>Graphene-Co<sub>3</sub>O<sub>4</sub></b>                           | High temperature treatment and hydrothermal reaction | SCE    | -0.23  | -0.11  | 4 at -0.6 V                            | 14 |
| <b>Nitrogen-doped CNT</b>                                             | High temperature treatment                           | Hg/HgO | ~-0.25 | N.A.   | 3.0 (the potential was not specified ) | 15 |
| <b>Co<sub>3</sub>O<sub>4</sub> nano-octahedrons/graphene</b>          | Reaction in solution and high temperature treatment  | Hg/HgO | N.A.   | -0.04  | ~3.8 at -0.3 to -0.5 V                 | 16 |

## References:

- 1 L. T. Qu, Y. Liu, J. B. Baek and L. M. Dai, *ACS Nano*, 2010, **4**, 1321-1326.
- 2 Z. Y. Lin, G. Waller, Y. Liu, M. L. Liu and C. P. Wong, *Adv. Energy Mater.*, 2012, **2**, 884-888.
- 3 Z. H. Sheng, L. Shao, J. J. Chen, W. J. Bao, F. B. Wang and X. H. Xia, *ACS Nano*, 2011, **5**, 4350-4358.
- 4 Z. Yang, Z. Yao, G. Li, G. Y. Fang, H. G. Nie, Z. Liu, X. M. Zhou, X. A. Chen and S. M. Huang,

*ACS Nano*, 2012, **6**, 205-211.

- 5 J. Liang, Y. Jiao, M. Jaroniec and S. Z. Qiao, *Angew. Chem. Int. Ed.*, 2012, **51**, 11496-11500.
- 6 K. P. Gong, F. Du, Z. H. Xia, M. Durstock and L. M. Dai, *Science*, 2009, **323**, 760-764.
- 7 P. Chen, T. Y. Xiao, Y. H. Qian, S. S. Li and S. H. Yu, *Adv. Mater.*, 2013, **25**, 3192-3196.
- 8 W. Wei, Y. Tao, W. Lv, F. Y. Su, L. Ke, J. Li, D. W. Wang, B. H. Li, F. Y. Kang and Q. H. Yang, *Sci. Rep.*, 2014, **4**, 6289.
- 9 S. S. Li, H. P. Cong, P. Wang and S. H. Yu, *Nanoscale*, 2014, **6**, 7534-7541.
- 10 Y. Y. Liang, Y. G. Li, H. L. Wang, J. G. Zhou, J. Wang, T. Regier and H. J. Dai, *Nat. Mater.*, 2011, **10**, 780-786.
- 11 Y. Y. Liang, H. L. Wang, P. Diao, W. Chang, G. S. Hong, Y. G. Li, M. Gong, L. M. Xie, J. G. Zhou, J. Wang, T. Z. Regier, F. Wei and H. J. Dai, *J. Am. Chem. Soc.*, 2012, **134**, 15849-15857.
- 12 J. J. Xiao, X. J. Bian, L. Liao, S. Zhang, C. Ji and B. H. Liu, *ACS Appl. Mater. Inter.*, 2014, **6**, 17654-17660.
- 13 G. L. Tian, M. Q. Zhao, D. S. Yu, X. Y. Kong, J. Q. Huang, Q. Zhang and F. Wei, *Small*, 2014, **10**, 2251-2259.
- 14 C. W. Sun, F. Li, C. Ma, Y. Wang, Y. L. Ren, W. Yang, Z. H. Ma, J. Q. Li, Y. J. Chen, Y. Kim and L. Q. Chen, *J. Mater. Chem. A*, 2014, **2**, 7188-7196.
- 15 T. Sharifi, G. Z. Hu, X. E. Jia and T. Wågberg, *ACS Nano*, 2012, **6**, 8904-8912.
- 16 J. W. Xiao, Q. Kuang, S. H. Yang, F. Xiao, S. Wang and L. Guo, *Sci. Rep.*, 2013, **3**, 2300.
